# Supplementary material for: Treatment of obstructive sleep apnea relieves stuttering priapism in patient with sickle cell disease: a case report
Source: PubMed Central journal article supplement — Transl Androl Urol. 2024 Jul 11;13(7):1297–301. doi: 10.21037/tau-24-94 (PMC11291398; doi:10.21037/tau-24-94), 2024-07-11
Supplement: tau-13-07-1297-rc.pdf [file tau-13-07-1297-rc.pdf]

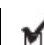

| Topic                            | Item No | Checklist item description                                                                                                                                                     | Reported on Page Number/Line Number | Reported on Section/Paragraph      |
|----------------------------------|---------|--------------------------------------------------------------------------------------------------------------------------------------------------------------------------------|-------------------------------------|------------------------------------|
| Title                            | 1       | The diagnosis or intervention of primary focus followed by the words "case report"                                                                                             | P1                                  | Line 1                             |
| Key Words                        | 2       | 2 to 5 key words that identify diagnoses or interventions in this case report, including "case report"                                                                         | P2                                  | Final paragraph                    |
| Abstract<br>(Structured summary) | 3a      | Background: state what is known and unknown; why the case report is unique and what it adds to existing literature.                                                            | P2                                  | Paragraph 1                        |
|                                  | 3b      | Case Description: describe the patient's demographic details, main symptoms, history, important clinical findings, the main diagnosis, interventions, outcomes and follow-ups. | P2                                  | Abstract; Para2/para3              |
|                                  | 3c      | Conclusions: summarize the main take-away lesson, clinical impact and potential implications.                                                                                  | P2                                  | Abstract; Para3                    |
| Introduction                     | 4       | One or two paragraphs summarizing why this case is unique ( <b>may include references</b> )                                                                                    | P3                                  | Introduction; Para1                |
| Patient Information              | 5a      | De-identified patient specific information                                                                                                                                     | P4                                  | Case presentation; All p4+para1 p5 |
|                                  | 5b      | Primary concerns and symptoms of the patient                                                                                                                                   | P4                                  | Case presentation; Para1           |
|                                  | 5c      | Medical, family, and psycho-social history including relevant genetic information                                                                                              | P4                                  | Case presentation; Para1           |
|                                  | 5d      | Relevant past interventions with outcomes                                                                                                                                      | P4                                  | Case presentation; Para1           |
| Clinical Findings                | 6       | Describe significant physical examination (PE) and important clinical findings                                                                                                 | P4                                  | Case presentation; Para2           |
| Timeline                         | 7       | Historical and current information from this episode of care organized as a timeline                                                                                           | P4/p5                               | Case presentation; all para        |
| Diagnostic Assessment            | 8a      | Diagnostic testing (such as PE, laboratory testing, imaging, surveys).                                                                                                         | P5                                  | Case presentation Para1            |
|                                  | 8b      | Diagnostic challenges (such as access to testing, financial, or cultural)p5                                                                                                    | N/A                                 | N/A                                |
|                                  | 8c      | Diagnosis (including other diagnoses considered)                                                                                                                               | P5                                  | Case presentation Para1            |
|                                  | 8d      | Prognosis (such as staging in oncology) where applicable                                                                                                                       | N/A                                 | N/A                                |
| Therapeutic Intervention         | 9a      | Types of therapeutic intervention (such as pharmacologic, surgical, preventive, self-care)                                                                                     | P4/p5                               | Case presentation; all para        |
|                                  | 9b      | Administration of therapeutic intervention (such as dosage, strength, duration)                                                                                                | P4                                  | Case presentation; Para2,3         |
|                                  | 9c      | Changes in therapeutic intervention (with rationale)                                                                                                                           | P5                                  | Case presentation; Para1           |

|                        |     |                                                                                                        |                                         |                             |
|------------------------|-----|--------------------------------------------------------------------------------------------------------|-----------------------------------------|-----------------------------|
| Follow-up and Outcomes | 10a | Clinician and patient-assessed outcomes (if available)                                                 | P5                                      | Case presentation; Para1    |
|                        | 10b | Important follow-up diagnostic and other test results                                                  | P5                                      | Case presentation Para1     |
|                        | 10c | Intervention adherence and tolerability (How was this assessed?)                                       | P4                                      | Case presentation Para2,3   |
|                        | 10d | Adverse and unanticipated events                                                                       | N/A                                     | N/A                         |
| Discussion             | 11a | A scientific discussion of the strengths AND limitations associated with this case report              | P5, p6, p7                              | Case presentation; para2    |
|                        | 11b | Discussion of the relevant medical literature <b>with references</b>                                   | P5,6,7                                  | Discussion; All para        |
|                        | 11c | The scientific rationale for any conclusions (including assessment of possible causes)                 | P7                                      | Discussion; Para2           |
|                        | 11d | The primary "take-away" lessons of this case report (without references) in a one paragraph conclusion | P2                                      | Highlight box               |
| Patient Perspective    | 12  | The patient should share their perspective in one to two paragraphs on the treatment(s) they received  | N/a                                     | n/a                         |
| Informed Consent       | 13  | Did the patient give informed consent? Please provide if requested                                     | Yes <input checked="" type="checkbox"/> | No <input type="checkbox"/> |

Article Information: <https://dx.doi.org/10.21037/tau-24-94>

\*As the checklist was provided upon initial submission, the page number/line number reported may be changed due to copyediting and may not be referable in the published version. In this case, the section/paragraph may be used as an alternative reference.
